# Supplementary material
Source: Springer Nature journal article supplement (https://www.springermedizin.de/resource/supplementary/13052_2014_374_MOESM2_ESM.pdf/9672000)
Supplement: MOESM2 [file 9672000]

**Standard infant formula**

**Switch from standard infant formula to special formulas**

(based on partially hydrolyzed whey proteins with prebiotic oligosaccharides or formulas containing probiotics)

*after 2 weeks*

Have colic symptoms improved?

Yes

Continue the employed formula

No

**Switch to extensively hydrolyzed formulas**

(based on casein or whey)

*after 2 weeks*

Have colic symptoms improved?

Yes

Continue the employed formula

No

**Return to standard formula**
